# Supplementary material
Source: publisher figshare collection journal article supplement (https://diabetesjournals.figshare.com/ndownloader/files/30578067)
Supplement: Supplementary file 1 [file 30578067]

## **Supplemental Materials**

### **Participants**

Subcutaneous abdominal adipose tissues were obtained from 6 overweight individuals who participated in a cross-sectional study at the AdventHealth Translational Research Institute (Table 1). All studies were approved by the AdventHealth Institutional Review Board and written informed consent was obtained prior to any procedures.

### **Body composition and blood analyses**

Body composition was measured by dual-energy x-ray absorptiometry (DXA) using a Lunar iDXA Whole-body Scanner (GE Healthcare Lunar, Madison, WI) (1). Fasting blood samples were analyzed in clinical chemistry laboratory at either AdventHealth or onsite at the Translational Research Institute.

### **Cardiorespiratory fitness**

VO<sub>2</sub> max was determined by a cycle ergometer exercise test (1). A metabolic cart was used to measure breath-by-breath VO<sub>2</sub> and VCO<sub>2</sub> (TrueOne 2400, PARVO Medics).

### **Biopsies**

All biopsies were performed after an overnight fast and at least 48 hours after any consumption of alcohol and caffeine and physical activity.

Adipose biopsy. Adipose tissue was obtained under local anesthesia from the subcutaneous abdominal region and immediately snap frozen in liquid nitrogen (2).

Skeletal muscle biopsy. Percutaneous muscle biopsies were obtained from the *vastus lateralis* using the Bergstrom technique (3). During the skeletal muscle biopsy procedure, intermuscular adipose tissue (IMAT) is sometimes collected with the sample. IMAT is carefully dissected from the skeletal muscle under a dissection scope and then snap frozen in liquid nitrogen.

### **RNA extraction and Microarray**

RNA was extracted from ~50mg of adipose tissue using the Qiagen RNeasy Fibrous Tissue Mini Kit (Qiagen Inc, Valencia, CA) (1). RNA purity and quantity were determined using a Biotek Synergy 2 plate reader (BioTek Instruments, Inc. Winooski, VT). Labeling of cRNA and hybridization to Human HT-12 Expression BeadChips (Illumina, San Diego, CA) was performed by the Genomics Core at Sanford Burnham Prebys Medical Discovery Institute (La Jolla, CA).

### **Bioinformatic Analysis**

Analysis of the microarray data were performed as previously described (Vegaaa). Briefly, the BeadChips array expression data were analyzed using a custom-built bioinformatic pipeline, including three seamless connected procedures: 1) raw data preprocessing, 2) differentially expressed gene (DEG) analysis, and 3) the assessment of exercise training remodeling effects. The raw data pre-processing follows the protocol established in beadarray, an R/Bioconductor package designed specifically for Illumine array analysis (4). Raw iDAT files from BeadScan were first read, then filtered to remove non-responding probes. Differences in expression levels across a chip and between chips were then corrected to normalize the signal. Finally, the gene expression values were log<sub>2</sub>-transformed and quantile normalized for subsequent statistical analysis. The DEG analyses were performed using Limma, an R/Bioconductor software package for gene discovery. Comparisons were made between the abdominal subcutaneous (SAT) intermuscular adipose tissues (IMAT). Once DEG sets were

identified, functional analysis was performed using clusterProfiler, an R/Bioconductor software package for gene set enrichment analysis (GSEA) (5). GSEA was performed on KEGG database (6) to identify significantly enriched biological pathways. Lastly, random forest predictors (7) was applied with split-variable randomization to find genes associated with group assignment and rank them according to their classification significances. The PCA analysis was performed with all DEGs with  $p < 0.05$  (8586 features). The gene expression data presented in this manuscript has been deposited in the NCBI's Gene Expression Omnibus and are accessible through the accession number GSE139258 and to reviewers using the following link: <https://www.ncbi.nlm.nih.gov/geo/query/acc.cgi?acc=GSE139258> with token gnmduyquvvgbbit.

## **Supplemental Table 1. Clinical Characteristics**

| <b>Clinical characteristics</b>   | <b>Females (n=6)</b> |
|-----------------------------------|----------------------|
| Body Weight (kg)                  | 86.3 ± 0.4           |
| BMI (kg/m <sup>2</sup> )          | 35.8 ± 2.5           |
| Fat mass (kg)                     | 40.3 ± 0.9           |
| Lean mass (kg)                    | 43.6 ± 0.9           |
| Waist circumference (cm)          | 104.4 ± 8.7          |
| Glucose (mg/dL)                   | 93.8 ± 10.9          |
| HbA1C (%)                         | 5.4 ± 0.2            |
| Fasting insulin (uIU/ml)          | 6.1 ± 3.2            |
| HOMA-IR                           | 1.4 ± 0.6            |
| VO <sub>2</sub> max (ml/kgBW/min) | 15.8 ± 1.0           |
| HDL (mg/dL)                       | 53.3 ± 9.9           |
| LDL (mg/dL)                       | 132.5 ± 27.4         |
| Triglycerides (mg/dL)             | 114.0 ± 64.4         |

Values are means ± SD. BMI, body mass index; HbA1c, hemoglobin A1c (glycosylated hemoglobin); HOMA-IR; homeostatic model assessment of insulin resistance; BW, body weight.

## References

1. Costford SR, Bajpeyi S, Pasarica M, Albarado DC, Thomas SC, Xie H, Church TS, Jubrias SA, Conley KE, Smith SR: Skeletal muscle NAMPT is induced by exercise in humans. *Am J Physiol Endocrinol Metab* 2010;298:E117-126
2. Pino MF, Divoux A, Simmonds AV, Smith SR, Sparks LM: Investigating the effects of Orexin-A on thermogenesis in human deep neck brown adipose tissue. *Int J Obes (Lond)* 2017;41:1646-1653
3. Bergstrom J: Percutaneous needle biopsy of skeletal muscle in physiological and clinical research. *Scand J Clin Lab Invest* 1975;35:609-616
4. Dunning MJ, Smith ML, Ritchie ME, Tavaré S: beadarray: R classes and methods for Illumina bead-based data. *Bioinformatics* 2007;23:2183-2184
5. Yu G, Wang LG, Han Y, He QY: clusterProfiler: an R package for comparing biological themes among gene clusters. *OMICS* 2012;16:284-287
6. Kanehisa M, Goto S: KEGG: kyoto encyclopedia of genes and genomes. *Nucleic Acids Res* 2000;28:27-30
7. Svetnik V, Liaw A, Tong C, Culberson JC, Sheridan RP, Feuston BP: Random forest: a classification and regression tool for compound classification and QSAR modeling. *J Chem Inf Comput Sci* 2003;43:1947-1958
